# Supplementary material for: SNAP25 Inhibits Glioma Progression by Regulating Synapse Plasticity via GLS-Mediated Glutaminolysis
Source: PubMed Central journal article supplement (PMC8416623; doi:10.3389/fonc.2021.698835), 2021-08-16
Supplement: DataSheet_1.pdf [file DataSheet_1.pdf]

**Supplementary Table 1: Association between SNAP25 expression levels and clinical/pathological characteristics in 40 patients with glioma**

| Characteristics | No. of patients (n=40) | Low expression (n=23) | High expression (n=17) | <i>P</i> |
|-----------------|------------------------|-----------------------|------------------------|----------|
| Gender          |                        |                       |                        |          |
| Male            | 21 (52.5%)             | 12 (52.2%)            | 9 (53.0%)              | 0.642    |
| Female          | 19 (47.5%)             | 11 (47.8%)            | 8 (47.0%)              |          |
| Age, year       |                        |                       |                        |          |
| <50             | 8 (20.0%)              | 3 (13.0%)             | 4 (23.5%)              | 0.504    |
| ≥50             | 32 (80.0%)             | 20 (87.0%)            | 20 (76.5%)             |          |
| WHO Grade       |                        |                       |                        |          |
| I/II            | 9 (22.5%)              | 1 (4.0%)              | 9 (53.0%)              | <0.001*  |
| III/IV          | 31 (77.6%)             | 22 (96.0%)            | 8 (47.0%)              |          |

Abbreviation: WHO=World Health Organization.

\*Statistical significance ( $p < 0.001$ ).

**Supplementary Table 2 : Primer sequences used for PCR**

| mRNA   | Forward Primer        | Reverse Primer          |
|--------|-----------------------|-------------------------|
| GAPDH  | GGAGCGAGATCCCTCCAAAAT | GGCTGTTGTCATACTTCTCATGG |
| SNAP25 | ACCAGTTGGCTGATGAGTCG  | CAAAGTCCTGATACCAGCATCTT |
| GLS    | AGGGTCTGTTACCTAGCTTGG | ACGTTGCAATCCTGTAGATTT   |

**Supplementary Table 3 : Abbreviations and their full names**

| ABBREVIATIONS | THE FULL NAMES                                                         |
|---------------|------------------------------------------------------------------------|
| SNAREs        | soluble N-ethylmaleimide-sensitive factor attachment protein receptors |
| SNAP25        | synaptosomal-associated protein 25                                     |
| TCGA          | The Cancer Genome Atlas                                                |
| CGGA          | the Chinese Glioma Genome Atlas                                        |
| GSEA          | gene set enrichment analysis                                           |
| LGG           | low grade glioma                                                       |
| GBM           | glioblastoma                                                           |
| LC-MS         | Liquid chromatography-high resolution mass spectrometry                |
| MAP2          | Microtubule Associated Protein 2                                       |
| GLS           | glutaminase                                                            |

|        |                                                        |
|--------|--------------------------------------------------------|
| TCA    | tricarboxylic acid                                     |
| U87MC  | U87MG-mCherry cell line                                |
| DEGS   | differentially expressed genes                         |
| OS     | overall survival                                       |
| PCA    | principal component analysis                           |
| PLS-DA | projections to latent structures discriminant analysis |
